# Supplementary material for: K2ZnMoP2O10: a novel nonlinear optical molybdophosphate with a strong second harmonic generation response and moderate birefringence
Source: Royal Society of Chemistry journal article supplement (doi:10.1039/d1tc03410c), 2021-01-01
Supplement: d1tc03410c1.pdf [file d1tc03410c1.pdf]

# **$K_2ZnMoP_2O_{10}$ : A Novel Nonlinear Optical Molybdophosphate with a Strong Second Harmonic Generation Response and Moderate Birefringence**

Haonan Liu, Hongping Wu,\* Hongwei Yu,\* Zhanggui Hu, Jiyang Wang, and Yicheng Wu

Tianjin Key Laboratory of Functional Crystal Materials, Institute of Functional Crystal, Tianjin  
University of Technology, Tianjin 300384, China.

To whom correspondence should be addressed. E-mail: hwyu15@gmail.com (Hongwei Yu).

## **CONTENTS**

|                                                                                             |           |
|---------------------------------------------------------------------------------------------|-----------|
| 1. <b>Table S1</b> (Crystallographic Data and Structure Refinements) .....                  | <b>S1</b> |
| 2. <b>Table S2</b> (Atomic coordinates, displacement parameters and BVS) .....              | <b>S2</b> |
| 3. <b>Table S3</b> (Selected bond distances and angles).....                                | <b>S3</b> |
| 4. <b>Table S4</b> (Experimental and calculated refractive indices).....                    | <b>S4</b> |
| 5. <b>Table S5</b> (The dipole moments in $ZnO_4$ , $MoO_6$ and $PO_4$ polyhedra).....      | <b>S4</b> |
| 6. <b>Figure S1</b> (Calculated and experimental PXRD patterns).....                        | <b>S5</b> |
| 7. <b>Figure S2</b> (TG/DSC patterns) .....                                                 | <b>S5</b> |
| 8. <b>Figure S3</b> (Hygroscopicity test chart).....                                        | <b>S5</b> |
| 9. <b>Figure S4</b> (PXRD and TG patterns of residues after moisture-stable analysis) ..... | <b>S6</b> |
| 10. <b>Figure S5</b> (Photograph of a [001]-faced wafer cut from the crystal).....          | <b>S6</b> |
| 11. <b>Figure S6</b> (Band gap).....                                                        | <b>S7</b> |
| 12. <b>Figure S7</b> (UPS spectrum) .....                                                   | <b>S7</b> |

**Table S1.** Crystallographic Data and Structure Refinements for  $K_2ZnMoP_2O_{10}$ .

|                                                                                                                          |                                                              |
|--------------------------------------------------------------------------------------------------------------------------|--------------------------------------------------------------|
| Empirical formula                                                                                                        | $K_2ZnMoP_2O_{10}$                                           |
| Fw(g/mol)                                                                                                                | 461.45                                                       |
| Temperature(K)                                                                                                           | 295(2)                                                       |
| Radiation, Wavelength                                                                                                    | Mo $K\alpha$ , $\lambda = 0.71073 \text{ \AA}$               |
| Crystal size (mm)                                                                                                        | $0.044 \times 0.045 \times 0.059$                            |
| Cryst syst.                                                                                                              | Orthorhombic                                                 |
| Space group                                                                                                              | $P2_12_12_1$ (No.19)                                         |
| Unit cell dimensions( $\text{\AA}$ )                                                                                     | $a = 9.418(3)$<br>$b = 9.693(3)$<br>$c = 10.141(2)$          |
| Unit cell volume( $\text{\AA}^3$ )                                                                                       | 925.8(4)                                                     |
| Z, $D_{\text{calcd}}$ ( $\text{mg/m}^3$ )                                                                                | 4, 3.311                                                     |
| $\mu$ ( $\text{mm}^{-1}$ )                                                                                               | 5.230                                                        |
| F(000)                                                                                                                   | 880                                                          |
| Theta range for data collection                                                                                          | 2.91 to 25.49°                                               |
| Limiting indices                                                                                                         | $-11 \leq h \leq 11, -11 \leq k \leq 11, -12 \leq l \leq 12$ |
| Reflections collected/unique                                                                                             | 7344 / 1725                                                  |
| R(int)                                                                                                                   | 0.0669                                                       |
| Coverage of independent reflections                                                                                      | 100.0 %                                                      |
| Absorption correction                                                                                                    | Numerical Mu From Formula                                    |
| Max. and min. transmission                                                                                               | 0.8670 and 0.7650                                            |
| Refinement method                                                                                                        | Full-matrix least-squares on $F^2$                           |
| Data/restraints/param                                                                                                    | 1725 / 0 / 145                                               |
| GOF on $F^2$                                                                                                             | 1.056                                                        |
| R indices [ $I > 2\sigma(I)$ ] <sup>a</sup>                                                                              | $R_1 = 0.0364, wR_2 = 0.0679$                                |
| R indices (all data)                                                                                                     | $R_1 = 0.0449, wR_2 = 0.0712$                                |
| Absolute structure parameter                                                                                             | 0.06(2)                                                      |
| Largest diff. peak and hole ( $e \text{ \AA}^{-3}$ )                                                                     | 0.686 and -0.850                                             |
| <sup>a</sup> $R_1 = \sum   F_o  -  F_c   / \sum  F_o , wR_2 = \{ \sum [w(F_o^2 - F_c^2)^2] / \sum [w(F_o^2)^2] \}^{1/2}$ |                                                              |

**Table S2.** Atomic coordinates and equivalent isotropic displacement parameters for  $K_2ZnMoP_2O_{10}$ .

| Atom | x           | y           | z           | U(eq)      | BVS  |
|------|-------------|-------------|-------------|------------|------|
| K1   | 0.3589(3)   | 0.9896(3)   | 0.4447(3)   | 0.0284(7)  | 1.00 |
| K2   | 0.8753(3)   | 0.1804(3)   | 0.2386(2)   | 0.0233(6)  | 1.09 |
| Zn1  | 0.54453(13) | 0.64478(12) | 0.40290(11) | 0.0134(3)  | 2.18 |
| Mo1  | 0.69033(9)  | 0.16988(9)  | 0.61643(8)  | 0.0105(2)  | 6.15 |
| P1   | 0.2875(3)   | 0.6278(3)   | 0.5733(2)   | 0.0107(6)  | 5.07 |
| P2   | 0.5572(3)   | 0.3166(3)   | 0.3506(2)   | 0.0092(6)  | 5.03 |
| O1   | 0.5684(8)   | 0.2583(8)   | 0.2111(7)   | 0.0177(18) | 1.90 |
| O2   | 0.2390(10)  | 0.5198(8)   | 0.4757(7)   | 0.029(2)   | 2.09 |
| O3   | 0.2177(8)   | 0.7638(8)   | 0.5383(7)   | 0.0185(18) | 2.18 |
| O4   | 0.2420(7)   | 0.5799(7)   | 0.7154(7)   | 0.0114(16) | 1.80 |
| O5   | 0.6711(8)   | 0.2365(8)   | 0.4324(6)   | 0.0215(19) | 2.10 |
| O6   | 0.4130(7)   | 0.2920(8)   | 0.4145(7)   | 0.0171(18) | 1.95 |
| O7   | 0.5230(8)   | 0.1084(8)   | 0.6339(7)   | 0.0226(19) | 2.14 |
| O8   | 0.6713(8)   | 0.3306(8)   | 0.6821(6)   | 0.0228(18) | 2.07 |
| O9   | 0.6028(8)   | 0.4665(8)   | 0.3454(8)   | 0.027(2)   | 2.10 |
| O10  | 0.4479(8)   | 0.6453(9)   | 0.5718(6)   | 0.027(2)   | 1.85 |

**Table S3.** Selected bond distances (Å) and angles (°) for  $K_2ZnMoP_2O_{10}$ .

| Distances (Å) |          |          |          |
|---------------|----------|----------|----------|
| K1-O7         | 2.719(8) | Zn1-O1#6 | 1.918(7) |
| K1-O8#7       | 2.795(8) | Zn1-O3#9 | 1.950(7) |
| K1-O9#4       | 2.973(8) | Zn1-O10  | 1.939(7) |
| K1-O9#7       | 3.244(8) | Mo1-O7   | 1.694(7) |
| K1-O3#1       | 2.731(8) | Mo1-O5   | 1.983(6) |
| K1-O1#4       | 2.828(8) | Mo1-O2#8 | 2.113(7) |
| K1-O6         | 2.991(8) | Mo1-O8   | 1.704(7) |
| K1-O5#7       | 3.425(8) | Mo1-O4#5 | 2.018(7) |
| K2-O7#8       | 2.793(8) | Mo1-O6#8 | 2.152(7) |
| K2-O4#8       | 2.857(7) | P1-O2    | 1.512(7) |
| K2-O8#8       | 2.903(8) | P1-O10   | 1.520(7) |
| K2-O1         | 3.000(8) | P2-O9    | 1.516(8) |
| K2-O7#2       | 3.144(8) | P2-O1    | 1.528(7) |
| K2-O5         | 2.802(7) | P1-O3    | 1.516(7) |
| K2-O2#4       | 2.882(8) | P1-O4    | 1.574(7) |
| K2-O10#3      | 2.914(8) | P2-O6    | 1.524(7) |
| K2-O3#4       | 3.051(8) | P2-O5    | 1.563(7) |
| Zn1-O9        | 1.904(8) |          |          |

---

| Angles (°)     |            |                 |           |
|----------------|------------|-----------------|-----------|
| O7-K1-O3#1     | 111.8(2)   | O5-K2-O8#13     | 118.2(2)  |
| O3#1-K1-O8#11  | 110.6(2)   | O2#7-K2-O8#13   | 123.2(2)  |
| O3#1-K1-O1#7   | 71.1(2)    | O5-K2-O10#5     | 133.4(3)  |
| O7-K1-O9#7     | 131.4(2)   | O2#7-K2-O10#5   | 95.1(2)   |
| O8#11-K1-O9#7  | 70.6(2)    | O7#13-K2-O1     | 109.8(2)  |
| O7-K1-O6       | 63.9(2)    | O4#13-K2-O1     | 79.3(2)   |
| O8#11-K1-O6    | 56.6(2)    | O8#13-K2-O1     | 163.8(2)  |
| O9#7-K1-O6     | 87.2(2)    | O7#13-K2-O3#7   | 112.0(2)  |
| O3#1-K1-O9#11  | 61.0(2)    | O4#13-K2-O3#7   | 104.9(2)  |
| O1#7-K1-O9#11  | 130.6(2)   | O8#13-K2-O3#7   | 122.7(2)  |
| O6-K1-O9#11    | 93.8(2)    | O1-K2-O3#7      | 64.59(19) |
| O3#1-K1-O5#11  | 104.1(2)   | O5-K2-O7#3      | 128.2(2)  |
| O1#7-K1-O5#11  | 160.6(2)   | O2#7-K2-O7#3    | 51.5(2)   |
| O6-K1-O5#11    | 50.62(18)  | O10#5-K2-O7#3   | 98.4(2)   |
| O7-K1-O8#11    | 114.8(2)   | O3#7-K2-O7#3    | 90.7(2)   |
| O7-K1-O1#7     | 126.3(2)   | O9-Zn1-O1#9     | 119.7(3)  |
| O8#11-K1-O1#7  | 113.0(2)   | O1#9-Zn1-O10    | 105.7(3)  |
| O3#1-K1-O9#7   | 110.0(2)   | O1#9-Zn1-O3#14  | 112.8(3)  |
| O1#7-K1-O9#7   | 50.0(2)    | O9-Zn1-O10      | 114.1(3)  |
| O3#1-K1-O6     | 154.7(2)   | O9-Zn1-O3#14    | 105.4(3)  |
| O1#7-K1-O6     | 132.7(2)   | O10-Zn1-O3#14   | 97.0(3)   |
| O7-K1-O9#11    | 84.5(2)    | O7-Mo1-O8       | 100.5(4)  |
| O8#11-K1-O9#11 | 75.5(2)    | O8-Mo1-O5       | 93.5(3)   |
| O9#7-K1-O9#11  | 138.52(17) | O8-Mo1-O4#8     | 95.6(3)   |
| O7-K1-O5#11    | 73.1(2)    | O7-Mo1-O2#13    | 86.7(4)   |
| O8#11-K1-O5#11 | 50.03(18)  | O5-Mo1-O2#13    | 83.5(3)   |
| O9#7-K1-O5#11  | 118.8(2)   | O7-Mo1-O6#13    | 169.1(3)  |
| O9#11-K1-O5#11 | 43.61(18)  | O5-Mo1-O6#13    | 84.0(3)   |
| O7#13-K2-O5    | 82.8(2)    | O2#13-Mo1-O6#13 | 82.7(3)   |
| O5-K2-O4#13    | 75.8(2)    | O7-Mo1-O5       | 97.3(3)   |
| O5-K2-O2#7     | 112.2(2)   | O7-Mo1-O4#8     | 93.1(3)   |
| O7#13-K2-O8#13 | 54.6(2)    | O5-Mo1-O4#8     | 164.7(3)  |
| O4#13-K2-O8#13 | 110.1(2)   | O8-Mo1-O2#13    | 172.5(4)  |
| O7#13-K2-O10#5 | 63.8(2)    | O4#8-Mo1-O2#13  | 85.9(3)   |
| O4#13-K2-O10#5 | 149.1(2)   | O8-Mo1-O6#13    | 90.1(3)   |
| O8#13-K2-O10#5 | 68.5(2)    | O4#8-Mo1-O6#13  | 83.7(3)   |
| O5-K2-O1       | 49.87(19)  | O2-P1-O10       | 111.8(5)  |
| O2#7-K2-O1     | 72.9(2)    | O2-P1-O4        | 108.3(4)  |
| O10#5-K2-O1    | 110.5(2)   | O10-P1-O4       | 108.2(4)  |
| O5-K2-O3#7     | 113.4(2)   | O9-P2-O6        | 114.7(4)  |
| O2#7-K2-O3#7   | 48.84(19)  | O6-P2-O1        | 113.4(4)  |
| O10#5-K2-O3#7  | 58.4(2)    | O6-P2-O5        | 108.0(4)  |
| O7#13-K2-O7#3  | 131.11(12) | O2-P1-O3        | 108.5(4)  |

---

|                |           |           |          |
|----------------|-----------|-----------|----------|
| O4#13-K2-O7#3  | 53.30(19) | O3-P1-O10 | 109.4(5) |
| O8#13-K2-O7#3  | 76.6(2)   | O3-P1-O4  | 110.7(4) |
| O1-K2-O7#3     | 119.1(2)  | O9-P2-O1  | 107.7(4) |
| O7#13-K2-O4#13 | 142.3(2)  | O9-P2-O5  | 107.5(5) |
| O7#13-K2-O2#7  | 158.6(2)  | O1-P2-O5  | 105.0(4) |
| O4#13-K2-O2#7  | 58.8(2)   |           |          |

**Table S4.** Experimental and calculated refractive indices for  $K_2ZnMoP_2O_{10}$ .

| $\lambda/\mu\text{m}$ | $n_x(n_a)$ |        | $n_y(n_b)$ |        | $n_z(n_c)$ |        | $n_z - n_x$ |
|-----------------------|------------|--------|------------|--------|------------|--------|-------------|
|                       | Exp.       | Calc.  | Exp.       | Calc.  | Exp.       | Calc.  |             |
| 0.4502                | 1.6613     | 1.6613 | 1.6763     | 1.6767 | 1.7147     | 1.7144 | 0.0534      |
| 0.532                 | 1.6482     | 1.6479 | 1.6620     | 1.6613 | 1.6955     | 1.6951 | 0.0473      |
| 0.6365                | 1.6389     | 1.6386 | 1.6511     | 1.6511 | 1.6863     | 1.683  | 0.0474      |
| 0.8293                | 1.6298     | 1.6301 | 1.6420     | 1.6420 | 1.6713     | 1.6715 | 0.0415      |
| 1.0626                | 1.6254     | 1.6252 | 1.6369     | 1.6368 | 1.6653     | 1.6651 | 0.0399      |

**Table S5.** The dipole moments in  $ZnO_4$ ,  $MoO_6$  and  $PO_4$  polyhedra in the unit cell of  $K_2ZnMoP_2O_{10}$ .

|                         | $Zn(1)O_4$ | $Mo(1)O_6$ | $P(1)O_4$ | $P(2)O_4$ |
|-------------------------|------------|------------|-----------|-----------|
| local dipole moments    | 2.35       | 0.94       | 0.42      | 3.00      |
| flexible dipole moments | 0.135      | 0.142      | 0.135     | 0.134     |

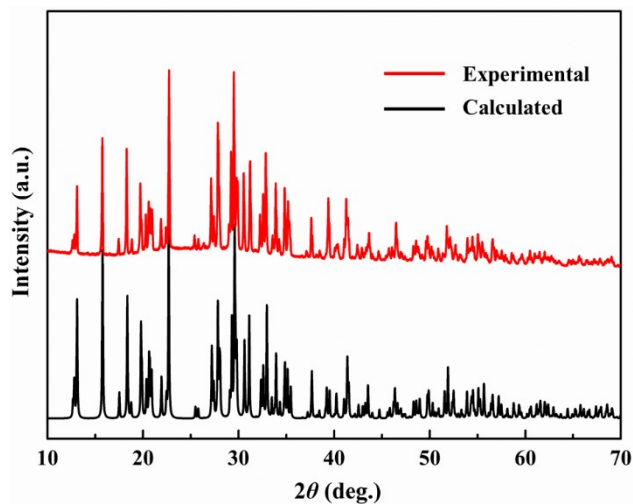

**Figure S1.** Calculated and experimental PXRD patterns for  $K_2ZnMoP_2O_{10}$ .

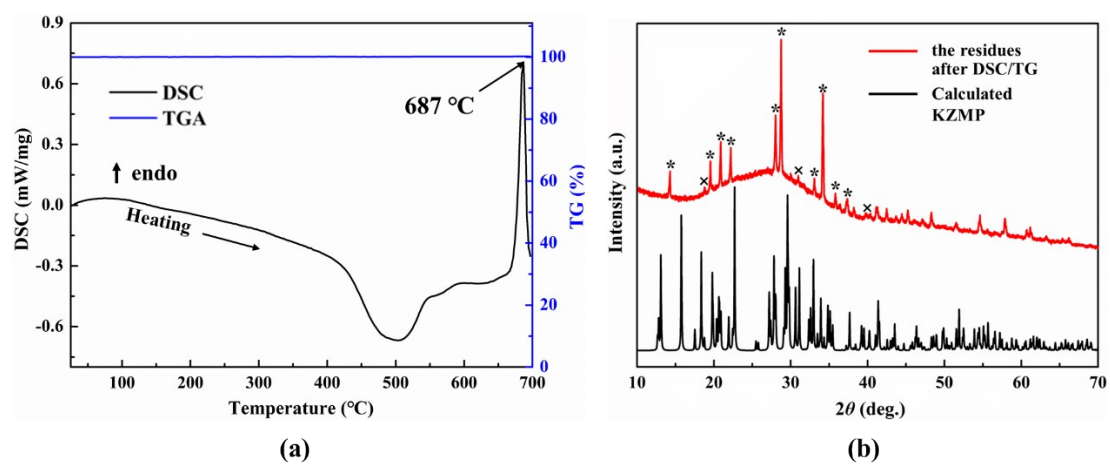

**Figure S2.** (a) TG/DSC patterns of  $K_2ZnMoP_2O_{10}$ . (b) The PXRD patterns of residues after TG/DSC of  $K_2ZnMoP_2O_{10}$  (\* =  $KZnPO_4$ , × = other unknown phase).

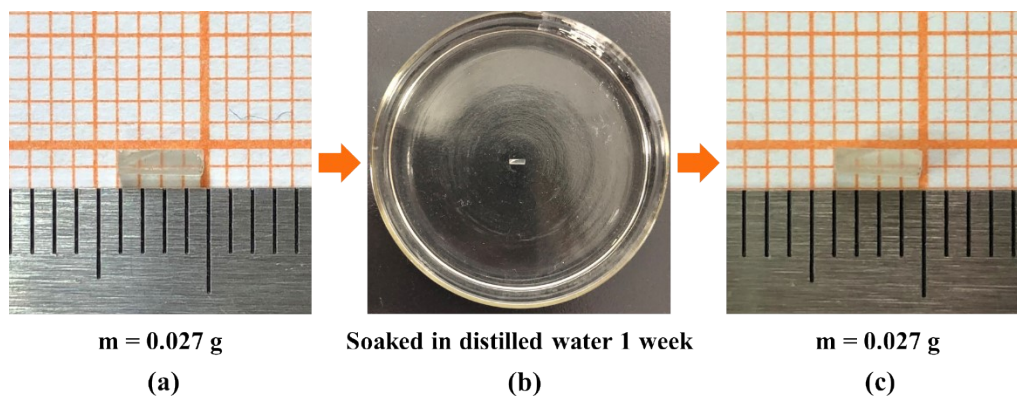

**Figure S3.** The moisture-stable analysis for  $K_2ZnMoP_2O_{10}$ : the  $K_2ZnMoP_2O_{10}$  crystal was soaked in the water for one week: (a) before soaking, (b) submerged sample, and (c) after soaking in water.

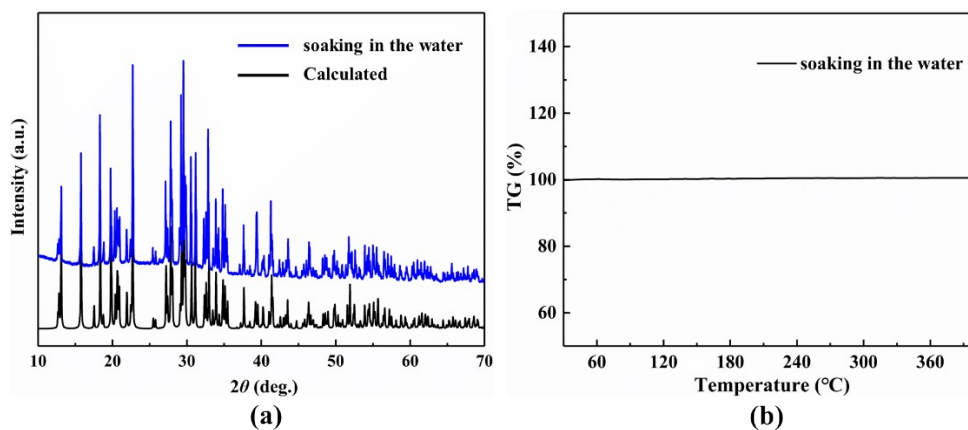

**Figure S4.** The PXRD (a) and TG (b) patterns of residues after moisture-stable analysis for  $\text{K}_2\text{ZnMoP}_2\text{O}_{10}$ .

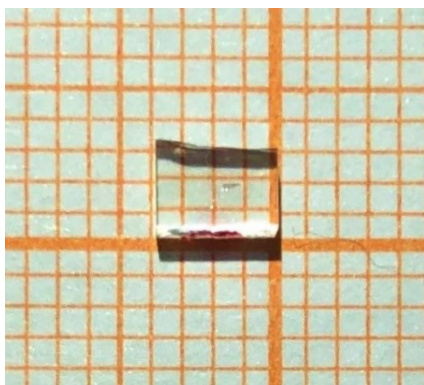

**Figure S5.** Photograph of a [001]-faced wafer cut from the crystal.

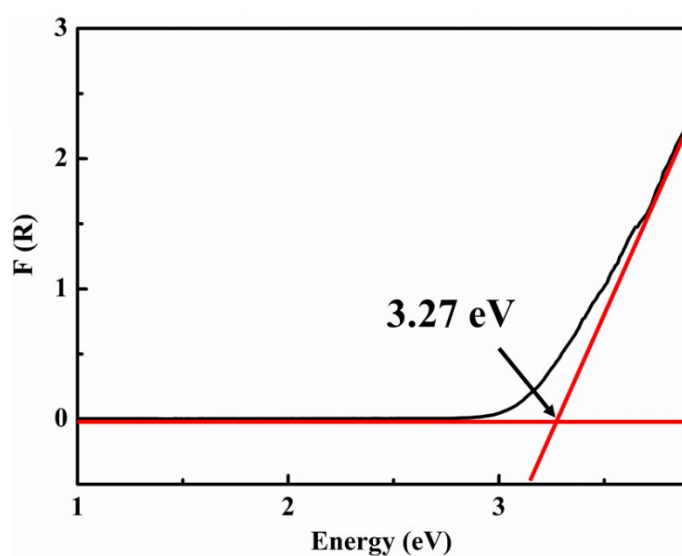

**Figure S6.** Band gap for  $\text{K}_2\text{ZnMoP}_2\text{O}_{10}$  of 3.27 eV.

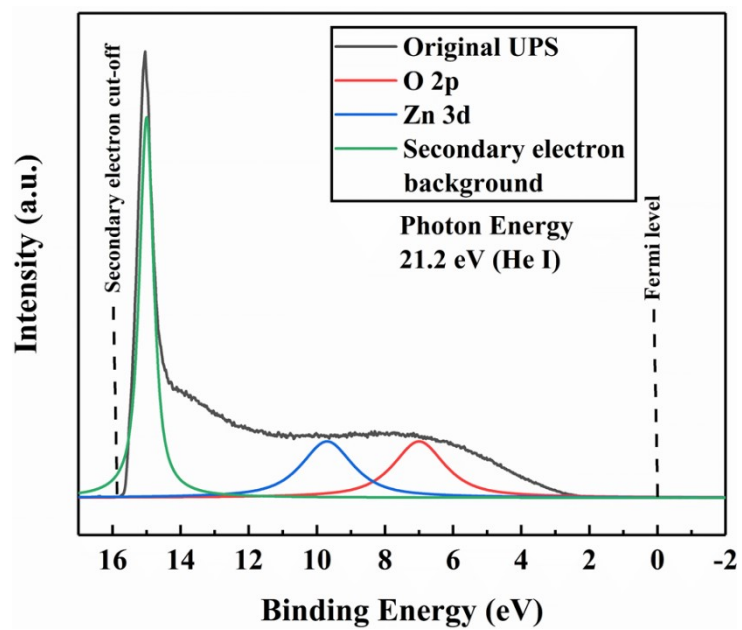

**Figure S7.** UPS spectrum of a  $\text{K}_2\text{ZnMoP}_2\text{O}_{10}$ .
